# Supplementary material for: Ternary CuSbSe2 chalcostibite: facile synthesis, electronic-structure and thermoelectric performance enhancement
Source: Royal Society of Chemistry journal article supplement (doi:10.1039/c6ta00039h), 2016-01-01
Supplement: c6ta00039h1.pdf [file c6ta00039h1.pdf]

Electronic Supplementary Information for

## Ternary $\text{CuSbSe}_2$ Chalcostibite: Facile Synthesis, Electronic-structure and Thermoelectric Performance Enhancement

Dan Zhang, Junyou Yang\*, Qinghui Jiang, Liangwei Fu, Ye Xiao, Yubo Luo, Zhiwei Zhou  
State Key Laboratory of Material Processing and Die & Mould Technology, Huazhong University  
of Science & Technology, Wuhan 430074, P. R China. E-mail: jyyang@mail.hust.edu.cn

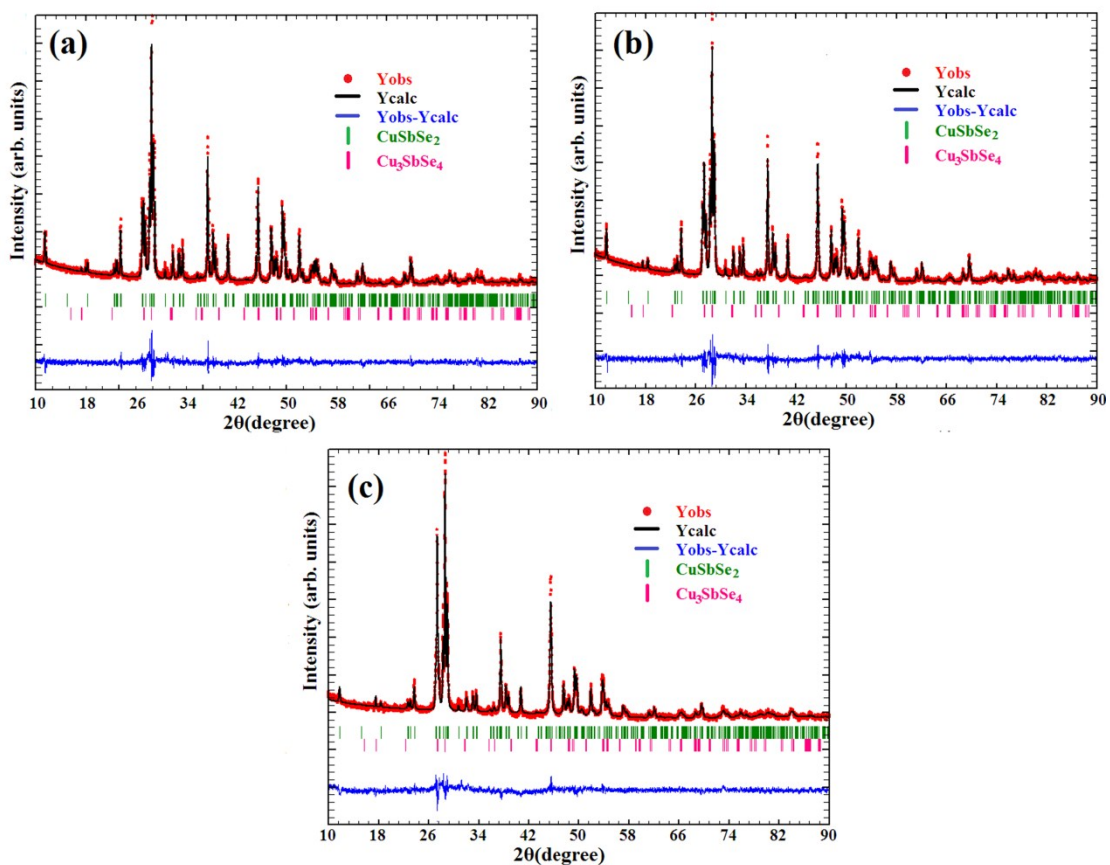

Fig. S1. Rietveld refinement using X-ray diffraction data for  $\text{CuSbSe}_2$  bulk sample (a)  $2\theta = 1$ ; (b)  $9$ -  
 $1$ ; (c)  $8$ - $2$ .
